# Supplementary material
Source: Preprints.org preprint supplement (doi:10.20944/preprints201912.0123.v1)
Supplement: Supplementary file 1 [file supplementary]

## Sheet: Sheet1
Faecal sample	Termites						Ants
	Head	Mouth parts	Thorax	Abdomen	wing	Legs	Head	Mouth parts	Thorax	Abdomen	Wing	Legs
1	0	2	0	0	23	0	9	2	0	2	0	3
2	0	1	0	0	25	1	4	1	1	0	0	2
3	0	0	0	0	12	0	15	1	0	4	0	0
4	0	2	1	0	6	0	8	5	0	4	1	4
5	0	0	0	0	12	0	9	3	0	0	1	0
6	0	3	0	0	11	2	8	5	0	6	0	3
7	0	4	0	0	0	2	20	4	0	6	1	0
8	0	3	0	0	9	0	14	9	0	11	0	4
9	0	0	0	0	15	1	23	8	0	8	2	0
10	0	4	0	2	8	0	9	6	0	13	0	1
11	0	6	0	0	17	0	12	8	0	4	0	2
12	0	2	0	0	18	2	16	11	0	4	0	4
13	0	0	0	0	0	0	30	21	1	8	0	0
14	0	0	1	0	8	0	20	8	0	3	2	6
15	0	4	0	0	0	3	24	5	0	6	0	4
16	0	5	0	0	21	2	0	0	0	0	0	0
17	2	4	0	1	9	0	12	4	0	4	0	0
18	0	2	1	0	14	1	6	2	0	0	0	3
19	0	4	0	0	4	0	12	4	0	3	0	5
20	0	6	0	0	5	0	4	6	0	4	2	9
21	0	3	0	1	0	0	24	8	0	5	1	1
22	0	4	0	0	10	2	5	4	0	3	0	5
23	0	0	0	0	9	0	23	8	0	8	0	4
24	1	4	0	0	20	0	4	4	0	3	2	6
25	0	5	0	0	4	0	15	5	0	6	0	4
26	0	0	0	0	0	0	26	3	3	5	0	6
27	0	4	0	0	5	1	28	9	0	2	0	5
28	0	8	1	0	22	1	8	8	0	3	0	6
29	2	2	0	0	32	1	0	0	0	0	0	0
30	0	3	0	1	6	0	12	3	0	6	2	8
31	2	4	0	0	5	2	0	0	0	0	0	0
32	1	8	0	0	0	0	25	3	0	5	0	4
